# Supplementary material for: Do the fragments from decomposed ZIF-8 greatly affect some of the intramolecular proton-transfer of thymine? A quantum chemical study
Source: Royal Society of Chemistry journal article supplement (doi:10.1039/c8ra03817a), 2018-01-01
Supplement: c8ra03817a1.pdf [file c8ra03817a1.pdf]

## Does the fragments from decomposed ZIF-8 greatly affect some of the intramolecular proton-transfer of Thymine? A quantum chemical study

Dejie Li, Ying Han, Huijuan Li, Ping Zhang, Qi Kang, Dazhong Shen\*

Corresponding author. Tel.: +86 0531 8618 0740; fax: +86 0531 8261 5258.

E-mail address: dzshen@sdu.edu.cn (D. Z. Shen).

**Fig. S1** Irreversible change of the pore structure of ZIF-8 caused by water molecules.

**Fig. S2** The sketch map of mispairing of GT'.

**Fig. S3** The molecular structures of T and T'' investigated.

**Fig. S4** The optimized structures of M·T-nw-ts in the tautomeric processes.

**Fig. S5** The proton-transferred structures of M·T'-nw in the tautomeric processes.

**Fig. S6** Energy barriers change in the different tautomeric processes including T-nw→T''-nw, MT-nw→MT''-nw and M·T-nw→M·T''-nw.

**Table S1** The Optimized Geometrical Parameters of T and T' Including the Transition State T-ts

**Table S2** NPA Charge Distribution (au) on a Portion of the Critical Atoms in T-nw and MT-nw

**Table S3** Relative Energies of Proton-Transferred Complexes based on Initial Structures

**Table S4** NPA Charge Distribution (au) on the Portion of M·T-nw

**Table S5** Energy Barrier Comparison from B3LYP, CAM-B3LYP and MP2 Methods

**Table S6** Energy Barriers of T→T' Proton-transfer Processes Affected by Hydrated M·

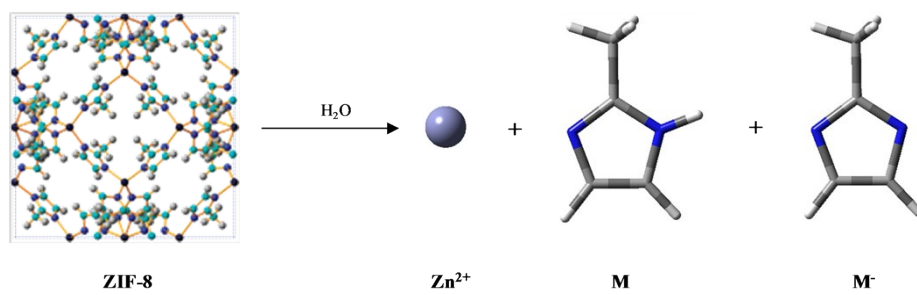

**Fig. S1** Irreversible change of the pore structure of ZIF-8 caused by water molecules.

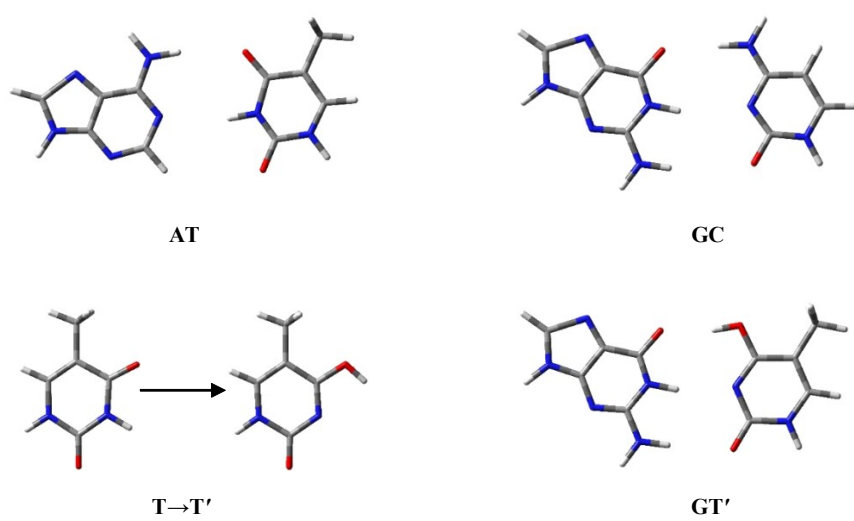

**Fig. S2** The sketch map of mispairing of GT'.

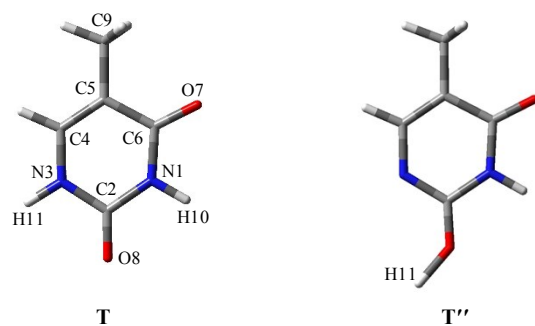

**Fig. S3** The molecular structures of T and T'' investigated. O, C, N atoms are shown in red, gray and blue colors, respectively.

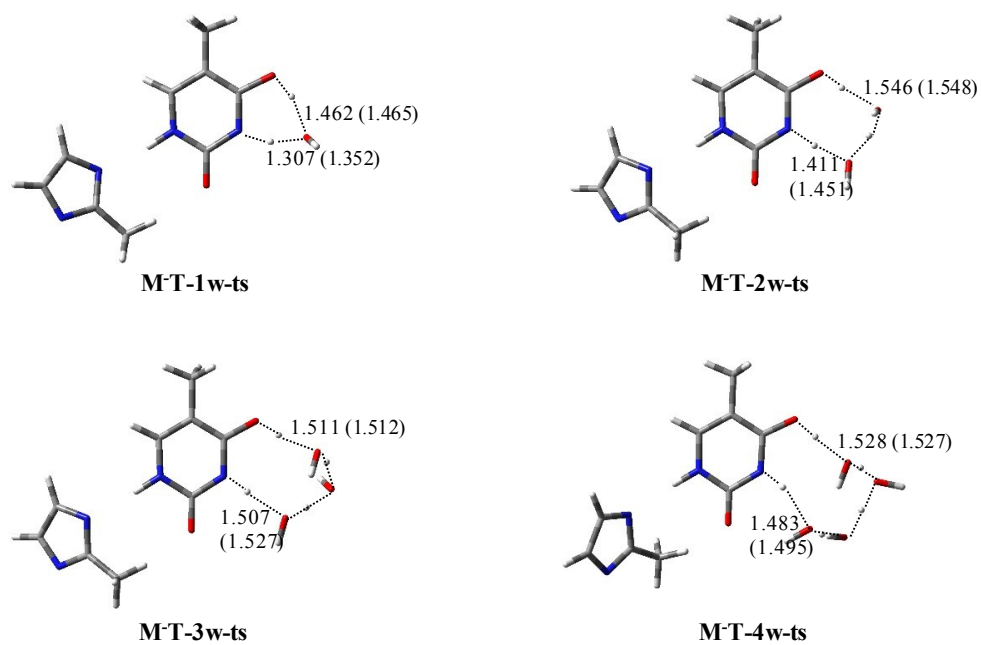

**Fig. S4** The optimized structures of M-T-nw-ts in the tautomeric processes. The route of proton-transfer are connected by dashed lines. Bond distances in angstrom (Å). Bond distances in parenthesis are obtained from MP2 method.

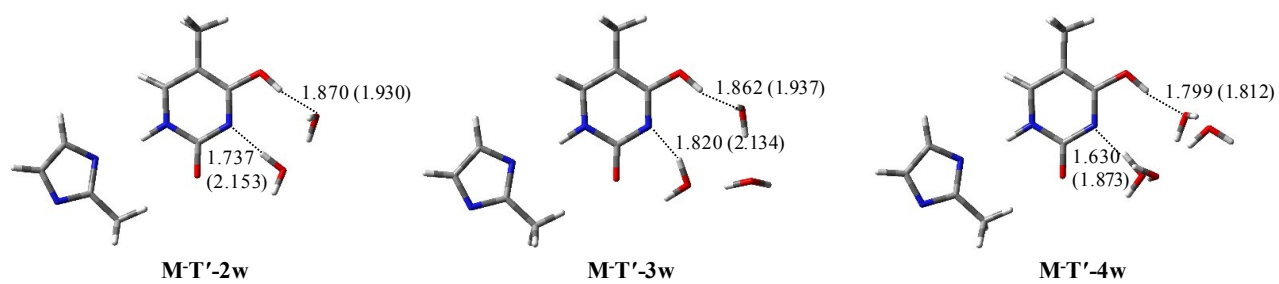

**Fig. S5** The proton-transferred structures of M-T'-nw in the tautomeric processes. The route of proton-transfer are connected by dashed lines. Bond distances in angstrom ( $\text{\AA}$ ). Bond distances in parenthesis are obtained from MP2 method.

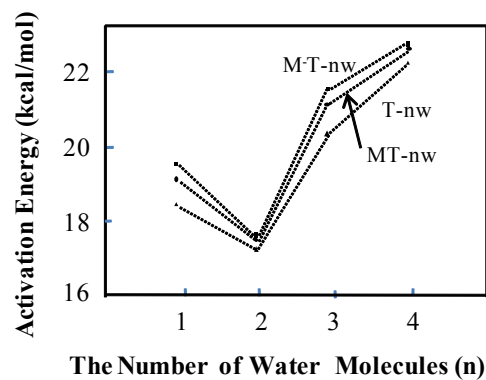

**Fig. S6** Energy barriers change in the different tautomeric processes including T-nw→T''-nw, MT-nw→MT''-nw and M-T-nw→M-T''-nw.

**Table S1** The Optimized Geometrical Parameters of T and T' Including the Transition State T-ts

| bond  | T     | T-ts  | T'    | Ref. 35 | Ref. 36 |
|-------|-------|-------|-------|---------|---------|
| N1-C2 | 1.386 | 1.372 | 1.379 | 1.390   | 1.379   |
| C2-N3 | 1.388 | 1.421 | 1.417 | 1.391   | 1.379   |
| N3-C4 | 1.382 | 1.367 | 1.361 | 1.387   | 1.375   |
| C4-C5 | 1.375 | 1.368 | 1.366 | 1.382   | 1.365   |
| C5-C6 | 1.468 | 1.431 | 1.438 | 1.470   | 1.356   |
| C6-N1 | 1.407 | 1.350 | 1.307 | 1.407   | 1.379   |
| C6-O7 | 1.225 | 1.287 | 1.348 | 1.227   | 1.224   |
| C2-O8 | 1.221 | 1.219 | 1.222 | 1.220   | 1.234   |
| C5-C9 | 1.502 | 1.503 | 1.504 | 1.502   | 1.502   |

Bond length in Å.



**Table S2** NPA Charge Distribution (au) on a Portion of the Critical Atoms in T-nw and MT-nw (n=0-4)

| n | T-nw / MT-nw <sup>a</sup> |              |                |              |                |              |                |              |
|---|---------------------------|--------------|----------------|--------------|----------------|--------------|----------------|--------------|
|   | O7                        | C6           | N1             | H10          | O8             | C2           | N3             | H11          |
| 0 | -0.604(-0.619)            | 0.654(0.652) | -0.671(-0.668) | 0.459(0.454) | -0.632(-0.660) | 0.808(0.813) | -0.638(-0.647) | 0.456(0.477) |
| 1 | -0.647(-0.661)            | 0.663(0.660) | -0.673(-0.669) | 0.484(0.479) | -0.626(-0.653) | 0.809(0.815) | -0.635(-0.643) | 0.456(0.477) |
| 2 | -0.669(-0.683)            | 0.672(0.670) | -0.675(-0.672) | 0.486(0.482) | -0.628(-0.654) | 0.810(0.815) | -0.634(-0.642) | 0.455(0.476) |
| 3 | -0.675(-0.686)            | 0.675(0.671) | -0.674(-0.671) | 0.487(0.482) | -0.637(-0.666) | 0.811(0.816) | -0.633(-0.640) | 0.455(0.476) |
| 4 | -0.674(-0.665)            | 0.676(0.667) | -0.674(-0.675) | 0.489(0.475) | -0.646(-0.665) | 0.812(0.815) | -0.632(-0.643) | 0.456(0.477) |

<sup>a</sup> MT-nw data are listed in parenthesis.

**Table S3** Relative Energies of Proton-Transferred Complexes based on Initial Structures (0 kcal mol<sup>-1</sup>)

| n | T'-nw                  | MT'-nw | M·T'-nw |
|---|------------------------|--------|---------|
| 0 | 11.0/11.2 <sup>a</sup> | 12.0   | 15.1    |
| 1 | 10.5                   | 10.9   | 12.0    |
| 2 | 8.9                    | 9.2    | 10.5    |
| 3 | 8.8                    | 9.1    | 9.6     |
| 4 | 8.4                    | 9.9    | 10.8    |

<sup>a</sup>MP2/6-311++G\*\* basis set used in Ref 30. All computed values are zero-point energy corrected.

**Table S4** NPA Charge Distribution (au) on the Portion of M<sup>-</sup>T-nw (n=0-4)

| n | M <sup>-</sup> | T      | w      |
|---|----------------|--------|--------|
| 0 | -0.570         | -0.430 | –      |
| 1 | -0.510         | -0.444 | -0.046 |
| 2 | -0.420         | -0.530 | -0.050 |
| 3 | -0.399         | -0.540 | -0.061 |
| 4 | -0.415         | -0.528 | -0.057 |

**Table S5** Energy Barrier Comparison from B3LYP, CAM-B3LYP and MP2 Methods

---

| n | T-nw                                                      | MT-nw              | M-T-nw             |
|---|-----------------------------------------------------------|--------------------|--------------------|
| 1 | 17.6 <sup>a</sup> / 21.3 <sup>b</sup> / 16.4 <sup>c</sup> | 17.7 / 20.3 / 16.5 | 16.3 / 15.1 / 17.8 |
| 2 | 16.3 / 20.0 / 15.5                                        | 16.6 / 21.6 / 15.8 | 14.4 / 13.4 / 15.1 |
| 3 | 17.8 / 21.6 / 16.3                                        | 18.9 / 22.7 / 17.5 | 15.2 / 14.3 / 16.3 |
| 4 | 20.5 / 24.0 / 18.7                                        | 20.8 / 24.3 / 18.3 | 16.8 / 15.7 / 18.7 |

---

<sup>a</sup> obtained by B3LYP. <sup>b</sup> obtained by CAM-B3LYP. <sup>c</sup> obtained by MP2.

**Table S6** Energy Barriers of T→T' Proton-transfer Processes Affected by Hydrated M<sup>-</sup>

| Proton-transfer structures         | Energy barriers |
|------------------------------------|-----------------|
| (monohydrated M <sup>-</sup> )T-1w | 16.7            |
| (dihydrated M <sup>-</sup> )T-1w   | 16.5            |
| (trihydrated M <sup>-</sup> )T-1w  | 16.4            |
| (monohydrated M <sup>-</sup> )T-2w | 15.8            |
| (dihydrated M <sup>-</sup> )T-2w   | 15.6            |
| (trihydrated M <sup>-</sup> )T-2w  | 15.5            |
| (monohydrated M <sup>-</sup> )T-3w | 17.3            |
| (dihydrated M <sup>-</sup> )T-3w   | 16.8            |
| (trihydrated M <sup>-</sup> )T-3w  | 16.6            |
| (monohydrated M <sup>-</sup> )T-4w | 20.1            |
| (dihydrated M <sup>-</sup> )T-4w   | 19.5            |
| (trihydrated M <sup>-</sup> )T-4w  | 19.3            |
